# Supplementary material
Source: Springer Nature journal article supplement (https://www.springermedizin.de/resource/supplementary/13019_2010_366_MOESM1_ESM.pdf/9638592)
Supplement: MOESM1 [file 9638592]

Electronic database search – Medline, the Cochrane Library, Embase, Ovid, the NHS Scotland e-Library, SIGN, NICE and Google

51 potentially relevant abstracts identified

9 studies excluded:  
No extractable data for cardiac surgery patients

42 studies identified with extractable data for cardiac surgery patients

13 studies excluded:  
No reference to tight vs normal glucose control

29 studies identified comparing tight vs normal glucose control

20 studies excluded:  
Non RCTs  
No efforts to blind/ randomise  
Unclear method  
Target glucose levels for tight or control group not specified  
No original data

9 RCTs met inclusion criteria

3 studies excluded:  
No comparable outcome measures

6 RCTs included in meta-analysis
